# Supplementary material
Source: PubMed Central journal article supplement (PMC4800984)
Supplement: NIHMS249215-supplement-Supp_Table_S1-S4.pdf [file NIHMS249215-supplement-Supp_Table_S1-S4.pdf]

**Supp. Table S1. Isoforms of collagen IV**

| Chain          | Isoform   | Residues    | Canonical sequence | Replacement                                                |
|----------------|-----------|-------------|--------------------|------------------------------------------------------------|
| $\alpha 1(IV)$ | Isoform 2 | 498 - 848   |                    | Missing                                                    |
| $\alpha 3(IV)$ | Isoform 2 | 1586 - 1670 | FTSAG...<br>MKKRH  | KAYSINCESWGIRKNNKSLSG<br>VHEEKTLLKKTAEVFFILKNK<br>VMTEHAVI |
|                | Isoform 3 | 1488-1670   | GTLGS...M<br>KKRH  | DALFVKVLRSP                                                |
|                | Isoform 4 | 1488-1670   | GTLGS...M<br>KKRH  | ESLFHQL                                                    |
|                | Isoform 5 | 1418 - 1424 | GPAGSDG            | ESLFFHQL                                                   |
|                |           | 1425 - 1670 |                    | Missing                                                    |
| $\alpha 5(IV)$ | Isoform 2 | 1264-1264   | G                  | GPTGFQG, longer isoform<br>found in the kidney             |
| $\alpha 6(IV)$ | Isoform 2 | 5           | MLINK              | Missing                                                    |

**Supp. Table S2. Predicted\* integrin-binding sites in collagen IV**

| Motif         | Residues                                       |                  |                  |                        |                  |                  |
|---------------|------------------------------------------------|------------------|------------------|------------------------|------------------|------------------|
|               | $\alpha$ 1 chain                               | $\alpha$ 2 chain | $\alpha$ 3 chain | $\alpha$ 4 chain       | $\alpha$ 5 chain | $\alpha$ 6 chain |
| <b>GFPGER</b> | 385 -<br>390                                   |                  | 756 - 761        | 915 - 920<br>984 - 989 | 400 - 405        |                  |
| <b>GAPGER</b> |                                                | 1257 -<br>1262   |                  |                        |                  |                  |
| <b>GFPGEK</b> |                                                |                  |                  |                        |                  | 596-600          |
| <b>GLPGEK</b> | 676 -<br>681<br>900 -<br>905<br>1112 -<br>1117 | 1347 -<br>1352   |                  |                        | 365 - 370        | 605-610          |

\* These have generally not been confirmed

**Supp. Table S3. Location of binding sites for laminin and other extracellular structural molecules**

| <b>Proposed laminin binding sites – location or distance from NCI</b>            |                    |                                     |                       |                               |     | <b>Reference</b>                                                 |
|----------------------------------------------------------------------------------|--------------------|-------------------------------------|-----------------------|-------------------------------|-----|------------------------------------------------------------------|
|                                                                                  |                    |                                     |                       |                               | NC1 | Rao et al., 1985                                                 |
| 7S domain                                                                        |                    |                                     |                       | *86 nm                        |     | Charonis et al., 1985                                            |
|                                                                                  | 251 nm             |                                     | 174 nm                | 87 nm                         |     | Ohno et al., 1991                                                |
|                                                                                  | 291 nm             | 216 nm                              |                       | 81 nm                         |     | Laurie et al., 1986                                              |
|                                                                                  |                    |                                     | 178 nm                | 75 nm                         |     | Aumailley et al., 1989                                           |
| <b>Summary of proposed laminin binding sites</b>                                 |                    |                                     |                       |                               |     |                                                                  |
| 7S domain                                                                        | 251-291nm (303 aa) | 216 nm (534 aa)                     | 174 – 178 nm (702 aa) | 75 – 87 nm (1100 aa)          | NC1 |                                                                  |
| <b>Overlap with other extracellular matrix binding sites – distance from NCI</b> |                    |                                     |                       |                               |     |                                                                  |
|                                                                                  |                    | Fibronectin (205 nm); HSPG (206 nm) |                       | Nidogen (75 nm); HSPG (82 nm) |     | Other binding sites (Laurie et al., 1986; Paralkar et al., 1990) |

\*Distances have been corrected so they are all measured in an amino direction from the intersection of the triple helix and carboxy NC1 domain.

**Supp. Table S4a. Missense mutations in the  $\alpha 5$  chain of collagen IV associated with early ('severe') or late onset renal failure in X-linked Alport syndrome – effect of substituting residue**

| <b>Gly substitutions</b> | <b>Number of missense mutations identified (%)</b> | <b>Number of mutations with severe disease (%)</b> | <b>Number of mutations with mild disease (%)</b> | <b>Number with severe: mild disease</b> |
|--------------------------|----------------------------------------------------|----------------------------------------------------|--------------------------------------------------|-----------------------------------------|
| <b>Arg - R</b>           | 44 (25%)                                           | 16 (36%)                                           | 5 (11%)                                          | 3.3                                     |
| <b>Cys - C</b>           | 9 (5%)                                             | 2 (22%)                                            | 3 (33%)                                          | 0.7                                     |
| <b>Ser - S</b>           | 23 (13%)                                           | 6 (26%)                                            | 8 (35%)                                          | 0.7                                     |
| <b>Ala -A</b>            | 7 (4%)                                             | 2 (29%)                                            | 1 (14%)                                          | 2.1                                     |
| <b>Asp -D</b>            | 29 (16%)                                           | 7 (24%)                                            | 5 (17%)                                          | 1.4                                     |
| <b>Glu - E</b>           | 32 (18%)                                           | 14 (44%)                                           | 3 (9%)                                           | 4.9                                     |
| <b>Val - V</b>           | 34 (19%)                                           | 13 (38%)                                           | 3 (9%)                                           | 4.2                                     |
| <b>Trp - W</b>           | 1 (1%)                                             | 0 (0%)                                             | 1 (100%)                                         | N/A                                     |
| <b>Pro - P</b>           | 0 (0%)                                             | 0 (0%)                                             | 0 (0%)                                           | N/A                                     |
| <b>Total</b>             | 179                                                | 60 (34%)                                           | 29 (16%)                                         | 1.2                                     |

**Supp. Table S4b. Missense mutations in the  $\alpha 5$  chain of collagen IV associated with early or late ('severe') onset renal failure in X-linked Alport syndrome – effect of location and ligand-binding site**

| <b>Disease-associated variants in <math>\alpha 5</math> chain</b> | <b>Total number</b> | <b>Number with severe disease</b> | <b>Number without severe disease or severity not specified</b> | <b>Severe/mild</b> |
|-------------------------------------------------------------------|---------------------|-----------------------------------|----------------------------------------------------------------|--------------------|
| <b>Total</b>                                                      | 209                 | 73                                | 32                                                             | 2.3                |
| <b>Amino one third (to residue 550)</b>                           | 27                  | 11                                | 4                                                              | 2.8                |
| <b>Collagenous domain</b>                                         | 179                 | 60                                | 29                                                             | 2.1                |
| <b>Noncollagenous residues</b>                                    | 30                  | 13                                | 3                                                              | 4.3                |
| <b>NC1 domain</b>                                                 | 20                  | 6                                 | 3                                                              | 2.0                |
| <b>Exons 25 and 26</b>                                            |                     | 15                                | 6                                                              | 2.5                |
| <b>Integrin-binding sites</b>                                     | 2                   | 2                                 | None                                                           |                    |
| <b>Heparin-binding sites</b>                                      | 3                   | 1                                 | 2                                                              | 0.3                |

Clinical phenotype (severe = early onset renal failure) was not available for all missense mutations in X-linked Alport syndrome and this table indicates whether mutations affecting a certain location or ligand-binding site were more likely to result in severe disease.
